# Supplementary material for: Stability of ruthenium/organic dye co-sensitized solar cells: a joint experimental and computational investigation
Source: Royal Society of Chemistry journal article supplement (doi:10.1039/c4ra09472g), 2014-10-20
Supplement: c4ra09472g1.pdf [file c4ra09472g1.pdf]

# **Stability of ruthenium/organic dye co-sensitized solar cells: A joint experimental and computational investigation**

*Paolo Salvatori,\* Saurabh Agrawal, Chiranjeevi Barreddi, Chandrasekharam Malapaka, Mervyn  
de Borniol, Filippo De Angelis,\**

**Electronic Supplementary Materials**

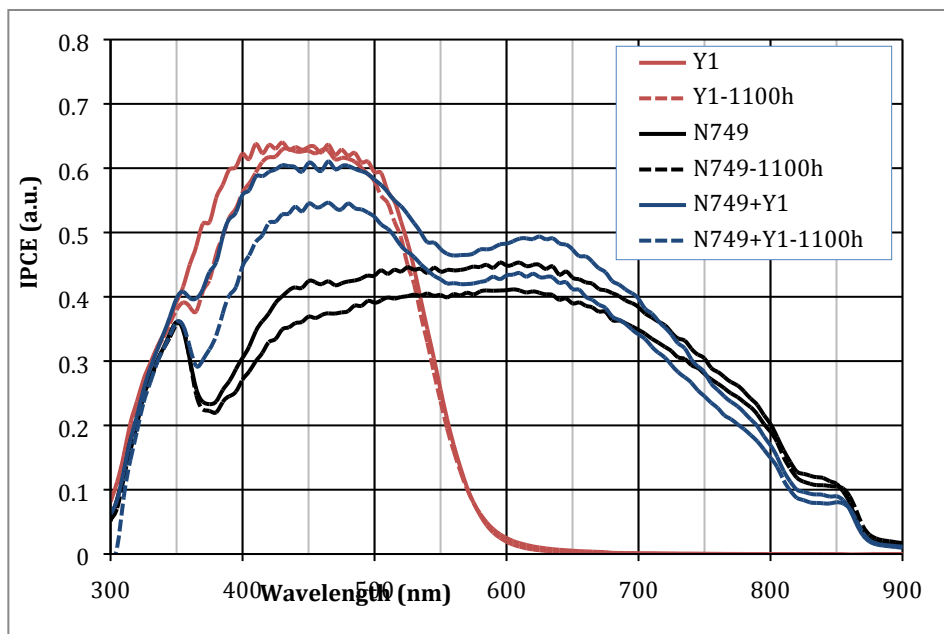

**Figure S1.** IPCE spectra for Y1, N749 and N749-Y1 cocktail dyes before and after ageing test.

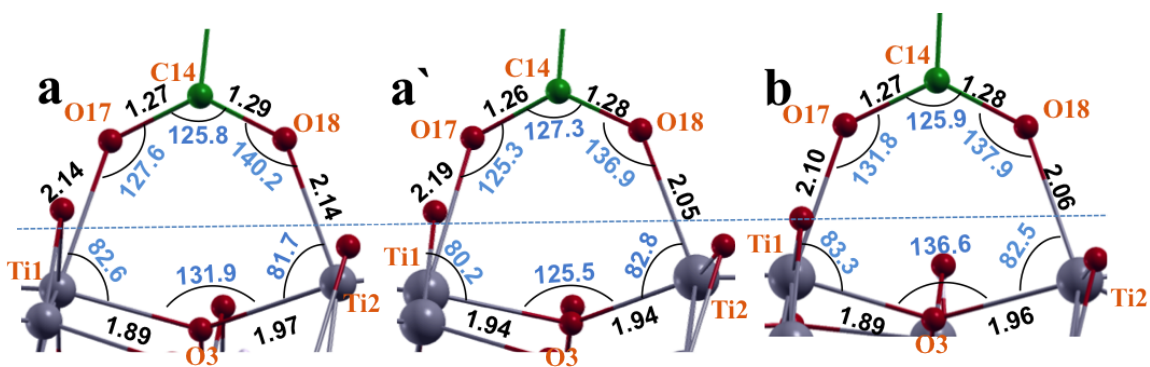

**Figure S2.** Structural details of the dye@TiO<sub>2</sub> interface. (a) Y1@TiO<sub>2</sub>, (a') Y1<sup>ox</sup>@TiO<sub>2</sub> and (b) Y2@TiO<sub>2</sub>.

**Table S1.** Main geometrical parameters for organic dye@TiO<sub>2</sub> interfaces.

| <b>Bond Distances<br/>(Å) and angles</b> | <b>Y1@TiO<sub>2</sub></b> | <b>Y1<sup>ox</sup>@TiO<sub>2</sub></b> | <b>Y2@TiO<sub>2</sub></b> |
|------------------------------------------|---------------------------|----------------------------------------|---------------------------|
| C14-O17                                  | 1.27                      | 1.26                                   | 1.27                      |
| C14-O18                                  | 1.29                      | 1.28                                   | 1.28                      |
| O17-Ti1                                  | 2.14                      | 2.19                                   | 2.10                      |
| O18-Ti2                                  | 2.01                      | 2.05                                   | 2.06                      |
| Ti1-O3                                   | 1.89                      | 1.94                                   | 1.89                      |
| Ti2-O3                                   | 1.97                      | 1.94                                   | 1.96                      |
| O17-Ti1-O3                               | 82.6°                     | 80.2°                                  | 83.3°                     |
| Ti1-O3-Ti2                               | 131.9°                    | 125.5°                                 | 136.6°                    |
| O18-Ti2-O3                               | 81.7°                     | 82.8°                                  | 82.5°                     |
| O17-C14-O18                              | 125.8°                    | 127.3°                                 | 125.9°                    |
| Ti1-O17-C14                              | 127.6°                    | 125.3°                                 | 131.8°                    |
| Ti2-O18-C14                              | 140.2°                    | 136.9°                                 | 137.9°                    |

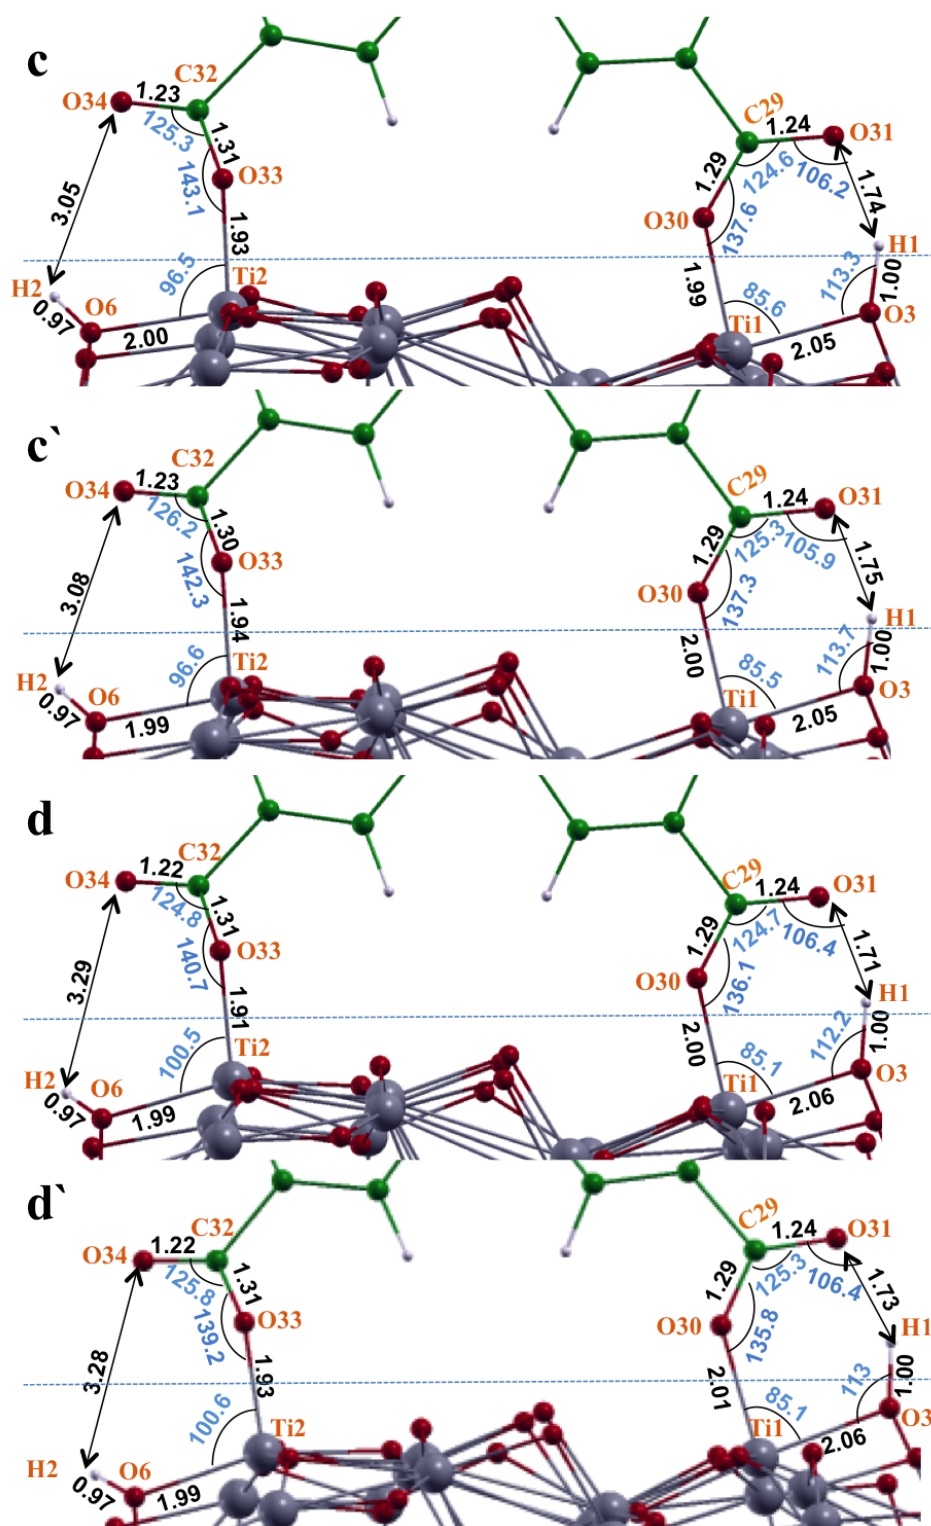

**Figure S3.** Structural details of the dye@TiO<sub>2</sub> interface. (c) N749@TiO<sub>2</sub>, (c') [N749]<sup>ox</sup>@TiO<sub>2</sub>, (d) [N749-TBA]@TiO<sub>2</sub> and (d') [N749-TBA]<sup>ox</sup>@TiO<sub>2</sub>.

**Table S2.** Geometrical parameters for N749@TiO<sub>2</sub> and [N749-TBA]@TiO<sub>2</sub> interfaces.

| <b>Bond Distances<br/>(Å) and angles</b> | <b>N749@TiO<sub>2</sub></b> | <b>[N749]<sup>ox</sup>@TiO<sub>2</sub></b> | <b>[N749-TBA]<br/>@TiO<sub>2</sub></b> | <b>[N749-TBA]<sup>ox</sup><br/>@TiO<sub>2</sub></b> |
|------------------------------------------|-----------------------------|--------------------------------------------|----------------------------------------|-----------------------------------------------------|
| C29-O30                                  | 1.29                        | 1.29                                       | 1.29                                   | 1.29                                                |
| C29-O31                                  | 1.24                        | 1.24                                       | 1.24                                   | 1.24                                                |
| O30-Ti1                                  | 1.99                        | 2.00                                       | 2.00                                   | 2.01                                                |
| O31-H1                                   | 1.74                        | 1.75                                       | 1.71                                   | 1.73                                                |
| Ti1-O3                                   | 2.05                        | 2.05                                       | 2.06                                   | 2.06                                                |
| O3-H1                                    | 1.00                        | 1.00                                       | 1.00                                   | 1.00                                                |
| C32-O33                                  | 1.31                        | 1.30                                       | 1.31                                   | 1.31                                                |
| C32-O34                                  | 1.23                        | 1.23                                       | 1.22                                   | 1.22                                                |
| O33-Ti2                                  | 1.93                        | 1.94                                       | 1.91                                   | 1.93                                                |
| O34-H2                                   | 3.05                        | 3.08                                       | 3.29                                   | 3.28                                                |
| Ti2-O6                                   | 2.00                        | 1.99                                       | 1.99                                   | 1.99                                                |
| O6-H2                                    | 0.97                        | 0.97                                       | 0.97                                   | 0.97                                                |
| O30-C29-O31                              | 124.6 °                     | 125.3 °                                    | 124.7 °                                | 125.3 °                                             |
| Ti1-O30-C29                              | 137.6 °                     | 137.3 °                                    | 136.1 °                                | 135.8 °                                             |
| C29-O31-H1                               | 106.2 °                     | 105.9 °                                    | 106.4 °                                | 106.4 °                                             |
| O30-Ti1-O3                               | 85.6 °                      | 85.5 °                                     | 85.1 °                                 | 85.1 °                                              |
| Ti1-O3-H1                                | 113.3 °                     | 113.7 °                                    | 112.2 °                                | 113.0 °                                             |
| O33-C32-O34                              | 125.3 °                     | 126.2 °                                    | 124.8 °                                | 125.8 °                                             |
| Ti2-O33-C32                              | 143.1 °                     | 142.3 °                                    | 140.7 °                                | 139.2 °                                             |
| O33-Ti2-O6                               | 96.5 °                      | 96.6 °                                     | 100.5 °                                | 100.6 °                                             |

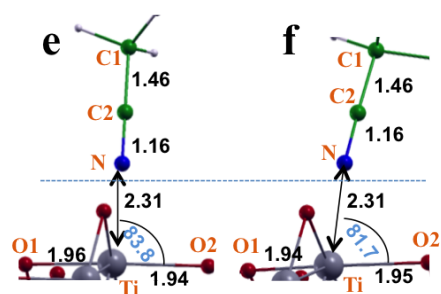

**Figure S4.** Structural details of the solvent-TiO<sub>2</sub> interface. (e) ACN@TiO<sub>2</sub>, (f) MPN@TiO<sub>2</sub>.

**Table S3.** Main geometrical parameters for ACN@TiO<sub>2</sub> and MPN@TiO<sub>2</sub> complexes.

| Bond Distances (Å)<br>and angles | ACN@TiO <sub>2</sub> | MPN@TiO <sub>2</sub> |
|----------------------------------|----------------------|----------------------|
| C1-C2                            | 1.46                 | 1.46                 |
| C2-N                             | 1.16                 | 1.16                 |
| N-Ti                             | 2.31                 | 2.31                 |
| O1-Ti                            | 1.96                 | 1.94                 |
| O2-Ti                            | 1.94                 | 1.95                 |
| Ti-N-C2                          | 170.2 °              | 170.4 °              |

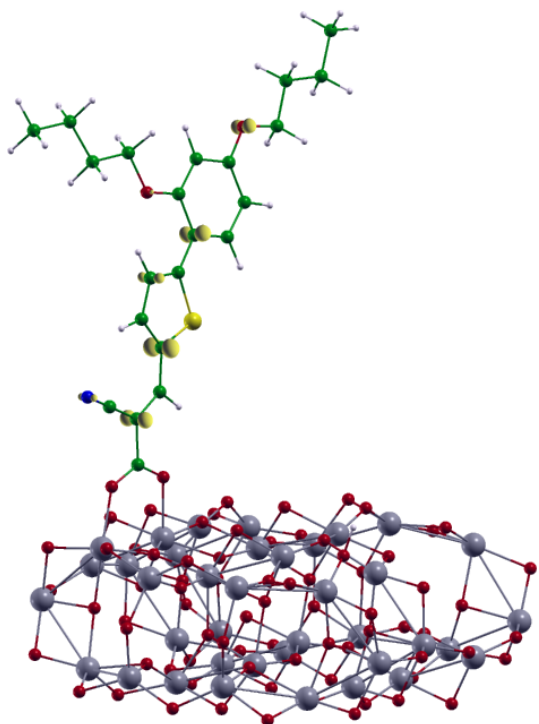

**Figure S5.** Spin density plots (isovalue 0.02 e/a.u.<sup>3</sup>) of Y1<sup>ox</sup>@TiO<sub>2</sub>.

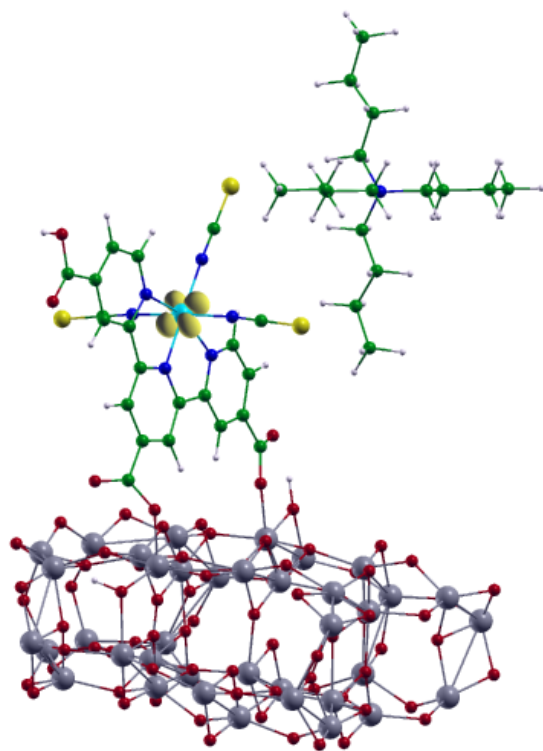

**Figure S6.** Spin density plots (isovalue 0.02 e/a.u.<sup>3</sup>) of [N749-TBA]<sup>ox</sup>@TiO<sub>2</sub>.
